# Supplementary material
Source: Research Square preprint supplement (doi:10.21203/rs.3.rs-8998026/v1)
Supplement: Supplementary file 1 [file 13a29a0558b766d040933929.docx]

| **Table 4:** Analysis of identified and embolized feeders in head and neck glomus tumors stratified by tumor location | | | | | | | | | | | | |
| --- | --- | --- | --- | --- | --- | --- | --- | --- | --- | --- | --- | --- |
|  | Total glomus tumors (n=23) | | Glomus Caroticum (n=11) | | Glomus Vagale (n=3) | | Glomus Jugulare (n=7) | | Glomus Tympanicum (n=2) | | | | |
| Embo. / Ident. (%) | Embolisate | Embo. / Ident. (%) | Embolisate | Embo. / Ident. (%) | Embolisate | Embo. / Ident. (%) | Embolisate | | Embo. / Ident. (%) | Embolisate | | |
| **Total feeders of Glomus tumor** | 56/113 (49.6) | Coils + PVA | 29/58 (50) | Coils + PVA | 5/17 (29.4) | Coils + PVA | 17/32 (53.1) | Coils + PVA | | 5/6 (83.3) | PVA | | |
| **ECA-derived feeders** | 53/96 (55.2) | Coils + PVA | 28/53 (52.8) | Coils + PVA | 4/12 (33.3) | Coils + PVA | 16/26 (61.5) | Coils + PVA | | 5/5 (100) | PVA | | |
| Superior thyroid | 9/12 (75) | Coils + PVA | 9/10 (90) | Coils + PVA | -/1 | - | -/1 | - | | - | - | | |
| Lingual | -/8 | - | -/6 | - | -/1 | - | -/1 | - | | - | - | | |
| Facial | -/8 | - | -/5 | - | -/1 | - | -/2 | - | | - | - | | |
| Ascending pharyngeal | 22/23 (95.7) | Coils + PVA | 10/11 (90.9) | Coils + PVA | 3/3 (100) | Coils + PVA | 7/7 (100) | Coils + PVA | | 2/2 (100) | PVA | | |
| Occipital | 13/19 (68.7) | Coils + PVA | 8/10 (80) | Coils + PVA | 1/2 (50) | Coils + PVA | 2/5 (40) | Coils + PVA | | 2/2 (100) | PVA | | |
| Posterior auricular | 5/11 (45.5) | Coils + PVA | 1/5 (20) | PVA | -/1 | - | 4/5 (80) | Coils + PVA | | - | - | | |
| Internal maxillary | 4/5 (80) | Coils + PVA | - | - | -/1 | - | 3/3 (100) | Coils | | 1/1 (100) | PVA | | |
| Middle meningeal | 1/1 (100) | Coils | - | - | - | - | 1/1 (100) | Coils | | - | - | | |
| Masseteric | 1/1 (100) | Coils | - | - | - | - | 1/1 (100) | Coils | | - | - | | |
| Posterior deep temporal | 1/1 (100) | Coils | - | - | - | - | 1/1 (100) | Coils | | - | - | | |
| Direct Internal maxillary | 1/2 (50) | PVA | - | - | -/1 | - | - |  | | 1/1 (100) | PVA | | |
| Direct branch of ECA | -/10 | - | -/6 | - | -/2 | - | -/2 | - | | - | - | | |
| **Non-ECA derived feeders** | 3/17 (17.6) | Coils + PVA | 1/5 (20) | PVA | 1/5 (20) | PVA | 1/6 (16.7) | Coils | | -/1 | - | | |
| ICA | 1/4 (25) | Coils | - | - | - | - | 1/3 (33.3) | Coils | | -/1 | - | | |
| Caroticotympanic | -/1 | - | - | - | - | - | -/1 | - | | - | - | | |
| Direct branch of ICA | 1/3 (33.3) | Coils | - | - | - | - | 1/2 (50) | Coils | | -/1 | - | | |
| VB | -/5 | - | -/1 | - | -/1 | - | -/3 | - | | - | - | | |
| Muscular branches | -/3 | - | -/1 | - | -/1 | - | -/1 | - | | - | - | | |
| AICA | -/1 | - | - | - | - | - | -/1 | - | | - | - | | |
| PICA | -/1 | - | - | - | - | - | -/1 | - | | - | - | | |
| Thyrocervical | 2/7 (28.6) | PVA | 1/3 (33.3) | PVA | 1/4 (25) | PVA | - | - | | - | - | | |
| Ascending cervical | 2/4 (50) | PVA | 1/2 (50) | PVA | 1/2 (50) | PVA | - | - | | - | - | | |
| Transverse cervical | -/1 | - | -/1 | - | - | - | - | - | | - | - | | |
| Direct branch | -/2 | - | - | - | -/2 | - | - | - | | - | - | | |
| Costocervical | -/1 | - | -/1 | - | - | - | - | - | | - | - | | |
| Posterior cervical artery | -/1 | - | -/1 | - | - | - | - | - | | - | - | | |
| *Embo.: Embolized feeders. Ident.: Identified feeders. ECA: External carotid artery. ICA: Internal Carotid Artery. VB: Vertebrobasilar Artery. AICA: Anterior Inferior Cerebellar Artery PICA: Posterior Inferior Cerebellar Artery. PVA: Polyvinyl Alcohol* | | | | | | | | | | | |
