# Supplementary material
Source: Research Square preprint supplement (doi:10.21203/rs.3.rs-8998026/v1)
Supplement: Supplementary file 2 [file 30fc6e6bbc102fb652b9efa9.docx]

| **Table 3:** Arterial feeders and embolization targets in head and neck glomus tumors | | | |
| --- | --- | --- | --- |
|  | **No. of identified feeders** | **No. of embolized feeders (% of identified)** | **Embolizing material** |
| **Arterial feeders of the Glomus tumor** | 113 | 56 (49.6%) |  |
| **ECA feeders** | 96 | 53 (55.2%) |  |
| Superior thyroid | 12 | 9 (75%) | Coils + PVA |
| Lingual | 8 | - | - |
| Facial | 8 | - | - |
| Ascending pharyngeal | 23 | 22 (95.7%) | Coils + PVA |
| Occipital | 19 | 13 (68.4%) | Coils + PVA |
| Posterior auricular | 11 | 5 (45.5%) | Coils + PVA |
| Internal maxillary | 5 | 4 (80%) | Coils + PVA |
| Middle meningeal | 1 | 1 (100%) | Coils |
| Masseteric | 1 | 1 (100%) | Coils |
| Posterior deep temporal | 1 | 1 (100%) | Coils |
| Direct Internal maxillary | 2 | 1 (50%) | PVA |
| Direct branch of ECA | 10 | - | - |
| **Non-ECA feeders** | 17 | 3 (17.6%) |  |
| ICA | 4 | 1 (25%) | Coils |
| Caroticotympanic | 1 | - | - |
| Direct branch of ICA | 3 | 1 (33.3%) | Coils |
| VB | 5 | - | - |
| Muscular branches | 3 | - | - |
| AICA | 1 | - | - |
| PICA | 1 | - | - |
| Thyrocervical | 7 | 2 (28.6%) | PVA |
| Ascending cervical | 4 | 2 (50%) | PVA |
| Transverse cervical | 1 | - | - |
| Direct branch | 2 | - | - |
| Costocervical | 1 | - | - |
| Posterior cervical artery | 1 | - | - |
| *ECA: External carotid artery. ICA: Internal Carotid Artery. VB: Vertebrobasilar Artery. AICA: Anterior Inferior Cerebellar Artery PICA: Posterior Inferior Cerebellar Artery* | | | |
