# Supplementary material
Source: Research Square preprint supplement (doi:10.21203/rs.3.rs-8998026/v1)
Supplement: Supplementary file 3 [file 4a7229ecb29c1386c33d99c7.docx]

| **Table 5:** The embolizing material of head and neck glomus tumor stratified by targeted embolized arterial feeder | | | |
| --- | --- | --- | --- |
| **ECA-derived feeders** | **Coils %** | **PVA%** | **Coils + PVA%** |
| Superior thyroid | 55.6% | - | 44.4% |
| Lingual | - | - | - |
| Facial | - | - | - |
| Ascending pharyngeal | 4.5% | 31.8% | 63.6% |
| Occipital | 15.4% | 23.1% | 61.5% |
| Posterior auricular | 20% | 60% | 20% |
| Internal maxillary | 75% | 25% | - |
| Middle meningeal | 100% | - | - |
| Masseteric | 100% | - | - |
| Posterior deep temporal | 100% | - | - |
| Direct Internal maxillary | - | 100% | - |
| Direct branch of ECA | - | - | - |
| *ECA: External carotid artery. PVA: Polyvinyl Alcohol* | | | |
