# Supplementary material
Source: Research Square preprint supplement (doi:10.21203/rs.3.rs-8998026/v1)
Supplement: Supplementary file 4 [file 7d2df68803b69d875e07e6cc.docx]

| **Table 1:** Clinico-radiological characteristics of head and neck glomus tumors | |
| --- | --- |
|  | **No. of patients (%)** |
| **Demographics** |  |
| Age (Mean, SD) | 51.6 (14.6) |
| Female | 15/23 (65.2%) |
| **Diagnosis** |  |
| Glomus caroticum | 11/23 (47.8%) |
| Glomus vagale | 3/23 (13%) |
| Glomus jugulare | 7/23 (30.4%) |
| Glomus tympanicum | 2/23 (8.7%) |
| **Tumor side** |  |
| Right | 14/23 (60.9%) |
| Left | 9/23 (39.1%) |
| **Size*** |  |
| Medium | 21/23 (91.3%) |
| Large | 2/23 (8.7%) |
| **Occlusion test**** |  |
| Successful | 23/23 (100%) |
| **Nuclear Medicine Occlusion Test** |  |
| Successful | 10/19 (52.6%) |
| **Tumor feeders** |  |
| ECA | 23/23 (100%) |
| Non-ECA | 9/23 (39.1%) |
| **Embolization outcome** |  |
| Adequate embolization*** | 23/23 (100%) |
| **Surgical resection outcome****** |  |
| Complete | 22/23 (95.7%) |
| Residual | 1/23 (4.3%) |
| **ECA status** |  |
| Sacrificed | 3/23 (13%) |
| **Clinical outcome at discharge (mRS)** |  |
| 0 | 12/23 (52.2%) |
| 1 | 9/23 (39.1%) |
| 2 | 2/23 (8.7%) |
| **Times from embolization to operation** |  |
| 1 day | 3/23 (13%) |
| 2 days | 7/23 (30.4%) |
| 3 days | 10/23 (43.5%) |
| 4 days | 2/23 (8.7%) |
| 5 days | 1/23 (4.3%) |
| **Size categorized as medium: 2-5 cm, large: > 5 cm. **Balloon occlusion test was used in 19 patients, and Matas test was used in four patients. *** Adequate embolization includes total or subtotal > 90% of the tumor embolized with confirmation of the avascularity of the tumor from the operative resection procedure ****Complete resection (Gross Total Resection) refers to removing all visible tumor, as confirmed by postoperative imaging; Residual resection (Subtotal Resection) indicates that part of the tumor remained following surgery. ECA: External carotid artery* | |
