# Supplementary material
Source: Research Square preprint supplement (doi:10.21203/rs.3.rs-8998026/v1)
Supplement: Supplementary file 5 [file c1cddebf49483d1187fd4a04.docx]

| **Table 2:** Clinico-radiological characteristics of head and neck glomus tumor stratified by tumor location | | | | | |
| --- | --- | --- | --- | --- | --- |
|  | **All the glomus tumor series (n = 23) N (%)** | **Glomus caroticum**  **(n = 11) N (%)** | **Glomus vagale (n = 3) N (%)** | **Glomus jugulare  (n = 7) N (%)** | **Glomus tympanicum (n = 2) N (%)** |
| **Tumor side** | | | | | |
| Right | 14 (60.9) | 7 (63.6) | 2 (66.7) | 5 (71.4) | - |
| Left | 9 (39.1) | 4 (36.4) | 1 (33.3) | 2 (28.6) | 2 (100) |
| **Size*** | | | | | |
| Small | - | - |  | - | - |
| Medium | 21 (91.3) | 11 (100) | 2 (66.7) | 6 (85.7) | 2 (100) |
| Large | 2 (8.7) | - | 1 (33.3) | 1 (14.3) | - |
| **Surgical resection outcome**** | | | | | |
| Complete removal | 22 (95.7) | 11 (100) | 3 (100) | 6 (85.1) | 2 (100) |
| Residual tumor | 1 (4.3) | - | - | 1 (14.3) | - |
| **Clinical outcome at discharge (mRS)** | | | | | |
| 0 | 12 (52.2) | 9 (81.8) | - | 2 (28.6) | 1 (50) |
| 1 | 9 (39.1) | 2 (18.2) | 2 (66.7) | 4 (57.1) | 1 (50) |
| 2 | 2 (8.7) | - | 1 (33.3) | 1 (14.3) | - |
| **Size categorized as small: > 2 cm, medium: 2-5 cm, large: > 5 cm.*  ***Complete resection (Gross Total Resection) refers to removing all visible tumor, as confirmed by postoperative imaging; Residual resection (Subtotal Resection) indicates that part of the tumor remained following surgery. ECA: External carotid artery.* | | | | | |
